# Supplementary material
Source: publisher site journal article supplement (https://www.dovepress.com/article/supplementary_file/546492/Supplementary%20Material%20_1.docx)
Supplement: Supplementary file 1 [file Supplementary%20Material%20_1.docx]

**
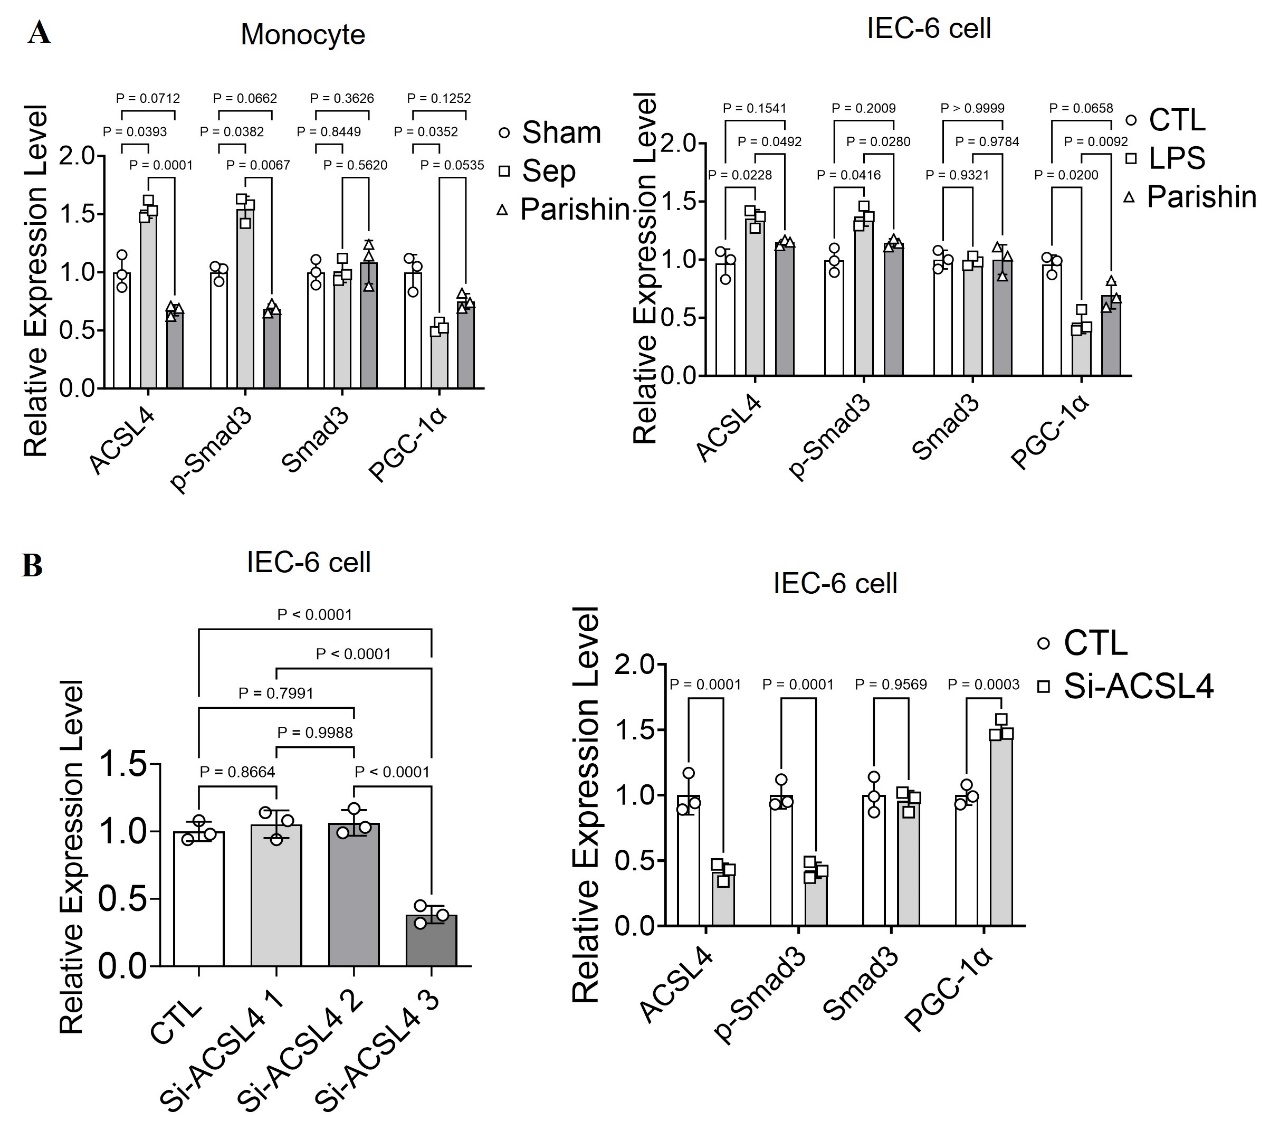
**

**Supplementary Figure 1.** The quantitative analysis of the expression of ACSL4, Smad3, phosphorylated Smad3 (p-Smad3), and PGC-1α in LPS-stimulated intestinal epithelial cells and monocytes(n=3). (B) The quantitative analysis of the expression of ACSL4 after treatment in Si-ACSL4 of IEC-6 cells(n=3).

**Supplementary table 1.** Statistical Descriptive Parameters for the Therapeutic Efficacy of Parishin in Alleviating Sepsis-Induced Intestinal Injury.

| Monocyte-ACSL4 | group | n | mean | SD | P |
| --- | --- | --- | --- | --- | --- |
| Sham | 3 | 1 | 0.12 | Sham vs Sep P=0.0004 |
| Sep | 3 | 17.97 | 4.2 | Sham vs Parishin P=0.0157 |
| Parshin | 3 | 9.23 | 0.95 | Parishin vs Sep P=0.012 |
| Intestine-ACSL4 | Sham | 3 | 1 | 0.03 | Sham vs Sep P=0.0001 |
| Sep | 3 | 8.57 | 1.3 | Sham vs Parishin P=0.0062 |
| Parshin | 3 | 4.53 | 0.78 | Parishin vs Sep P=0.0032 |
| Plasma DAO (U/L) | Sham | 6 | 27.43 | 5.33 | Sham vs Sep P＜0.0001 |
| Sep | 6 | 81.88 | 13.71 | Sham vs Parishin P=0.0002 |
| Parshin | 6 | 56.6 | 6.04 | Parishin vs Sep P=0.0007 |
| Plasma D-Lac (mmol/L) | Sham | 6 | 0.54 | 0.17 | Sham vs Sep P＜0.0001 |
| Sep | 6 | 1.91 | 0.32 | Sham vs Parishin P=0.32 |
| Parshin | 6 | 0.76 | 0.27 | Parishin vs Sep P＜0.0001 |
| Plasma LPS (U/L) | Sham | 6 | 2.92 | 1.08 | Sham vs Sep P＜0.0001 |
| Sep | 6 | 10.5 | 1.31 | Sham vs Parishin P=0.0008 |
| Parshin | 6 | 5.943 | 0.92 | Parishin vs Sep P＜0.0001 |
| plasma TNF-α (pg/ml) | Sham | 6 | 164.8 | 49.65 | Sham vs Sep P＜0.0001 |
| Sep | 6 | 379.2 | 44.45 | Sham vs Parishin P=0.0009 |
| Parshin | 6 | 275.5 | 26.15 | Parishin vs Sep P=0.0016 |
| Plasma IL-1β (pg/ml) | Sham | 6 | 87.83 | 10.72 | Sham vs Sep P＜0.0001 |
| Sep | 6 | 244 | 25.4 | Sham vs Parishin P＜0.0001 |
| Parshin | 6 | 160.2 | 17.39 | Parishin vs Sep P＜0.0001 |
| Plasma IL-6 (pg/ml) | Sham | 6 | 182.2 | 43.92 | Sham vs Sep P＜0.0001 |
| Sep | 6 | 355.8 | 52.8 | Sham vs Parishin P=0.0462 |
| Parshin | 6 | 253.5 | 43.11 | Parishin vs Sep P=0.0048 |
| Relative cell viability | CTL | 6 | 1 | 0.03 | CTL vs LPS P＜0.0001 |
| LPS | 6 | 0.38 | 0.03 | LPS vs 20uM P=0.4077 |
| 20uM | 6 | 0.42 | 0.06 | 20uM vs 50uM P＜0.0001 |
| 50uM | 6 | 0.66 | 0.07 | LPS vs 50uM P＜0.0001 |

**Supplementary Table 2.** Statistical Descriptive Parameters for the Regulatory Effect of Parishin on Ferroptosis During Sepsis.

|  | | group | n | mean | SD | P |
| --- | --- | --- | --- | --- | --- | --- |
| Intestine MDA | | Sham | 6 | 3.14 | 1.1 | Sham vs Sep P＜0.0001 |
| Sep | 6 | 17.32 | 2.8 | Sham vs Parishin P=0.0021 |
| Parshin | 6 | 7.61 | 1.08 | Parishin vs Sep P＜0.0001 |
| Intestine total Fe | | Sham | 6 | 15.05 | 5.97 | Sham vs Sep P=0.0001 |
| Sep | 6 | 49.4 | 8.85 | Sham vs Parishin P=0.0086 |
| Parshin | 6 | 30.12 | 7.3 | Parishin vs Sep P=0.0012 |
| Monocyte MDA | | Sham | 6 | 5 | 1.73 | Sham vs Sep P＜0.0001 |
| Sep | 6 | 22.22 | 8.44 | Sham vs Parishin P=0.097 |
| Parshin | 6 | 11.53 | 1.62 | Parishin vs Sep P=0.0062 |
| Monocyte total Fe | | Sham | 6 | 32.05 | 7.22 | Sham vs Sep P＜0.0001 |
| Sep | 6 | 80.97 | 9.59 | Sham vs Parishin P=0.0072 |
| Parshin | 6 | 47.79 | 5.41 | Parishin vs Sep P＜0.0001 |
| MFI of FerroOrange | | Sham | 3 | 3629 | 549.19 | Sham vs Sep P=0.0013 |
| Sep | 3 | 10086 | 1839.14 | Sham vs Parishin P=0.0595 |
| Parshin | 3 | 6446 | 694.77 | Parishin vs Sep P=0214 |
| MFI of Liperfluo | | Sham | 3 | 660 | 90.81 | Sham vs Sep P=0.0127 |
| Sep | 4 | 2531 | 932.34 | Sham vs Parishin P=0.9892 |
| Parshin | 3 | 730.6 | 87.84 | Parishin vs Sep P=0.0154 |
| Intestine | WB-GPX4 | Sham | 3 | 0.95 | 0.1 | Sham vs Sep P=0.0012 |
| Sep | 3 | 0.35 | 0.12 | Sham vs Parishin P=0.0295 |
| Parshin | 3 | 0.67 | 0.05 | Parishin vs Sep P=0.0469 |
| WB-SLC7A11 | Sham | 3 | 0.97 | 0.11 | Sham vs Sep P=0.0145 |
| Sep | 3 | 0.39 | 0.09 | Sham vs Parishin P=0.0323 |
| Parshin | 3 | 0.69 | 0.04 | Parishin vs Sep P=0.0340 |
| WB-COX2 | Sham | 3 | 0.93 | 0.08 | Sham vs Sep P=0.0092 |
| Sep | 3 | 1.57 | 0.03 | Sham vs Parishin P=0.0216 |
| Parshin | 3 | 1.25 | 0.03 | Parishin vs Sep P=0.0002 |
| Monocyte | WB-GPX4 | Sham | 3 | 0.97 | 0.18 | Sham vs Sep P＜0.0001 |
| Sep | 3 | 0.46 | 0.08 | Sham vs Parishin P=0.0108 |
| Parshin | 3 | 0.69 | 0.04 | Parishin vs Sep P=0.0399 |
| WB-SLC7A11 | Sham | 3 | 0.97 | 0.1 | Sham vs Sep P＜0.0001 |
| Sep | 3 | 0.44 | 0.09 | Sham vs Parishin P=0.0150 |
| Parshin | 3 | 0.7 | 0.06 | Parishin vs Sep P=0.0163 |
| WB-COX2 | Sham | 3 | 0.97 | 0.16 | Sham vs Sep P＜0.0001 |
| Sep | 3 | 1.74 | 0.06 | Sham vs Parishin P=0.0006 |
| Parshin | 3 | 1.36 | 0.08 | Parishin vs Sep P=0.0008 |
| IEC-6 cell | WB-GPX4 | CTL | 3 | 1 | 0.10 | CTL vs LPS P=0.0305 |
| LPS | 3 | 0.53 | 0.10 | CTL vs Parishin P=0.1644 |
| Parshin | 3 | 0.74 | 0.10 | Parishin vs LPS P=0.0305 |
| WB-SLC7A11 | CTL | 3 | 1 | 0.11 | CTL vs LPS P=0.0335 |
| LPS | 3 | 0.49 | 0.11 | CTL vs Parishin P=0.0477 |
| Parshin | 3 | 0.7 | 0.08 | Parishin vs LPS P=0.0194 |
| WB-COX2 | CTL | 3 | 1 | 0.04 | CTL vs LPS P=0.0102 |
| LPS | 3 | 1.73 | 0.04 | CTL vs Parishin P=0.0268 |
| Parshin | 3 | 1.41 | 0.07 | Parishin vs LPS P=0.0055 |

**Supplementary Table 3.** Statistical Descriptive Parameters for the Effect of Parishin on Improving Mitochondrial Function in LPS-Stimulated Intestinal Epithelial Cells and Monocytes.

|  |  | group | n | mean | SD | P |
| --- | --- | --- | --- | --- | --- | --- |
| Monocyte-ACSL4 | | Sham | 3 | 1 | 0.14 | Sham vs Sep P=0.0039 |
| Sep | 3 | 1.54 | 0.08 | Sham vs Parishin P=0.071 |
| Parshin | 3 | 0.67 | 0.05 | Parishin vs Sep P=0.0001 |
| Monocyte-p-Smad3 | | Sham | 3 | 1 | 0.07 | Sham vs Sep P=0.0382 |
| Sep | 3 | 1.54 | 0.11 | Sham vs Parishin P=0.0662 |
| Parshin | 3 | 0.69 | 0.04 | Parishin vs Sep P=0.0067 |
| Monocyte-Smad3 | | Sham | 3 | 1 | 0.11 | Sham vs Sep P=0.8449 |
| Sep | 3 | 1.01 | 0.10 | Sham vs Parishin P=0.3626 |
| Parshin | 3 | 1.09 | 0.19 | Parishin vs Sep P=0.5620 |
| Monocyte-PGC-1α | | Sham | 3 | 1 | 0.15 | Sham vs Sep P＜0.0001 |
| Sep | 3 | 0.53 | 0.04 | Sham vs Parishin P=0.32 |
| Parshin | 3 | 0.75 | 0.07 | Parishin vs Sep P＜0.0001 |
| IEC-6 cell-ACSL4 | | CTL | 3 | 0.97 | 0.12 | CTL vs LPS P=0.0228 |
| LPS | 3 | 1.35 | 0.08 | CTL vs Parishin P=0.1541 |
| Parshin | 3 | 1.15 | 0.03 | Parishin vs LPS P=0.0492 |
| IEC-6 cell-p-Smad3 | | CTL | 3 | 0.99 | 0.11 | CTL vs LPS P=0.0416 |
| LPS | 3 | 1.37 | 0.09 | CTL vs Parishin P=0.2009 |
| Parshin | 3 | 1.14 | 0.04 | Parishin vs LPS P=0.02800 |
| IEC-6 cell-Smad3 | | CTL | 3 | 1 | 0.08 | CTL vs LPS P=0.9321 |
| LPS | 3 | 1 | 0.04 | CTL vs Parishin P=0.9999 |
| Parshin | 3 | 1 | 0.13 | Parishin vs LPS P=0.9784 |
| IEC-6 cell-PGC-1α | | CTL | 3 | 0.96 | 0.08 | CTL vs LPS P=0.0200 |
| LPS | 3 | 0.46 | 0.1 | CTL vs Parishin P=0.0658 |
| Parshin | 3 | 0.69 | 0.12 | Parishin vs LPS P=0.0092 |
| IEC-6 cell | | CTL | 3 | 1 | 0.07 | CTL vs Si-ACSL4 1 P=0.8664 |
| Si-ACSL4 1 | 3 | 1.05 | 0.1 | CTL vs Si-ACSL4 2 P=0.7991 |
| Si-ACSL4 2 | 3 | 1.06 | 0.09 | CTL vs Si-ACSL4 3 P＜0.0001 |
| Si-ACSL4 3 | 3 | 0.38 | 0.07 | Si-ACSL4 2 vs Si-ACSL4 3 P＜0.0001 |
| IEC-6 cell | CTL | ACSL4 | 3 | 1 | 0.15 | / |
| p-Smad3 | 3 | 1 | 0.1 | / |
| Smad3 | 3 | 1 | 0.14 | / |
| PGC-1α | 3 | 1 | 0.08 | / |
| Si-ACSL4 | ACSL4 | 3 | 0.41 | 0.07 | CTL vs Si-ACSL4 P=0.0001 |
| p-Smad3 | 3 | 0.43 | 0.06 | CTL vs Si-ACSL4 P=0.0001 |
| Smad3 | 3 | 0.96 | 0.08 | CTL vs Si-ACSL4 P=0.9569 |
| PGC-1α | 3 | 1.5 | 0.07 | CTL vs Si-ACSL4 P=0.0003 |
